# Supplementary material for: Regorafenib Alteration of the BCL-xL/MCL-1 Ratio Provides a Therapeutic Opportunity for BH3-Mimetics in Hepatocellular Carcinoma Models
Source: PubMed Central journal article supplement (PMC7073154; doi:10.3390/cancers12020332), 2020-02-01

# Supplementary materials: Regorafenib alteration of the BCL-xL/MCL-1 ratio provides a therapeutic opportunity for BH3-mimetics in hepatocellular carcinoma models

Blanca Cucarull, Anna Tutusaus, Miguel Subías, Milica Stefanovic, Tania Hernández, Loreto Boix, María Reig, Pablo García de Frutos, Montserrat Marí, Anna Colell, Jordi Bruix, and Albert Morales

Table S1. Patient's data.

| GENDER | AGE | Underlying liver disease | ETHIOLOGY       | Virus hepatitis | AFP (ngr/mL) | TUMOR SIZE (cm)  | Tumor              | Vascular Invasion  |
|--------|-----|--------------------------|-----------------|-----------------|--------------|------------------|--------------------|--------------------|
| M      | 67  | cirrhosis                | alcohol         | NO              |              | 4,5              | single             | NA                 |
| M      | 54  | cirrhosis                | VHC+VHB+alcohol | VHC+VHB         | 15           | 1,3              | single             | NA                 |
| M      | 50  | cirrhosis                | VHC+alcohol     | VHC             | 19           | 1,4              | single             | NA                 |
| M      | 61  | chronic hepatitis        | VHC             | VHC             | 20           | 1,8              | single             | Yes                |
| M      | 33  | chronic hepatitis        | VHB             | VHB             | 4            | 1,1              | single             | No                 |
| F      | 61  | cirrhosis                | VHC             | VHC             | 11           | 2,1              | single             | No                 |
| M      | 56  | cirrhosis                | VHC             | VHC             | 2            | 5,2 (principal)  | multinodular       | No                 |
| M      | 68  | cirrhosis                | alcohol         | No              | 1515         | 5                | single             | Yes, microvascular |
| M      | 61  | cirrhosis                | alcohol         | No              | 2            | 3,5              | single+1 satellite | No                 |
| M      | 47  | cirrhosis                | VHC             | VHC             | 6            | 2,5              | single             | No                 |
| M      | 75  | cirrhosis                | VHC             | VHC             | 23           | 1,1 ( principal) | binodular          | No                 |
| F      | 69  | cirrhosis                | VHC             | VHC             | 7            | 1,2              | single             | Yes, microvascular |
| M      | 78  | cirrhosis                | VHC             | VHC             |              | 4,5              | single             | No                 |
| M      | 73  | cirrhosis                | VHC             | VHC             | 2            | 2,1              | single             | No                 |
| M      | 67  | cirrhosis                | VHC             | VHC             | 22           | 2,1              | single             | No                 |
| M      | 63  | cirrhosis                | VHC             | VHC             | 2            | 2,2              | single             | No                 |
| M      | 63  | chronic hepatitis        | VHC             | VHC             | 9            | 6                | single             | No                 |
| M      | 48  | cirrhosis                | VHC             | VHC             | 7            | 7,5              | single             | Yes, peritumoral   |
| M      | 64  | cirrhosis                | alcohol         | NO              | 6            | 4,5              | single             | No                 |
| M      | 68  | healthy liver            | NA              | NO              | NA           | NA               | NA                 | NA                 |
| F      | 70  | healthy liver            | NA              | NO              | NA           | NA               | NA                 | NA                 |
| F      | 47  | healthy liver            | NA              | NO              | NA           | NA               | NA                 | NA                 |
| F      | 50  | healthy liver            | NA              | NO              | NA           | NA               | NA                 | NA                 |
| F      | 55  | healthy liver            | NA              | NO              | NA           | NA               | NA                 | NA                 |
| M      | 36  | healthy liver            | NA              | NO              | NA           | NA               | NA                 | NA                 |
| M      | 36  | healthy liver            | NA              | NO              | NA           | NA               | NA                 | NA                 |
| M      | 55  | healthy liver            | NA              | NO              | NA           | NA               | NA                 | NA                 |
| M      | 37  | healthy liver            | NA              | NO              | NA           | NA               | NA                 | NA                 |
| F      | 73  | healthy liver            | NA              | NO              | NA           | NA               | NA                 | NA                 |

## Supplemental Figure 1

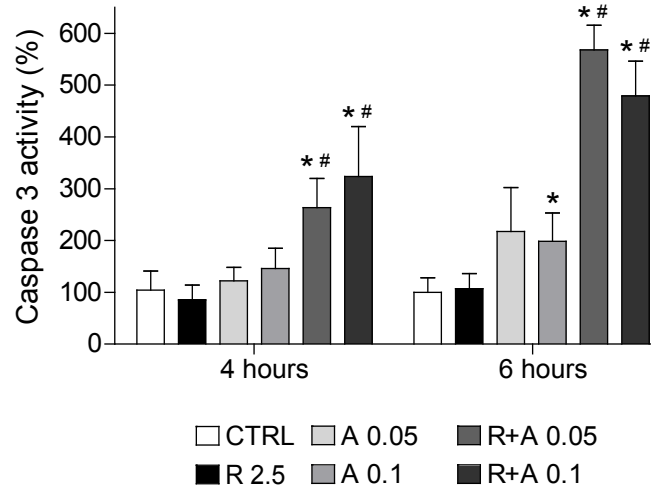

HepG2 cells were exposed to regorafenib (R, 2.5  $\mu\text{M}$ ) with or without A-1331852 (A, 0.1-0.05  $\mu\text{M}$ ) and caspase-3 activity was determined fluorimetrically at four and six hours. \* $P < 0.05$  vs. control cells, # $P < 0.05$  vs. regorafenib-treated cells. (n=3)

## Supplemental Figure 2

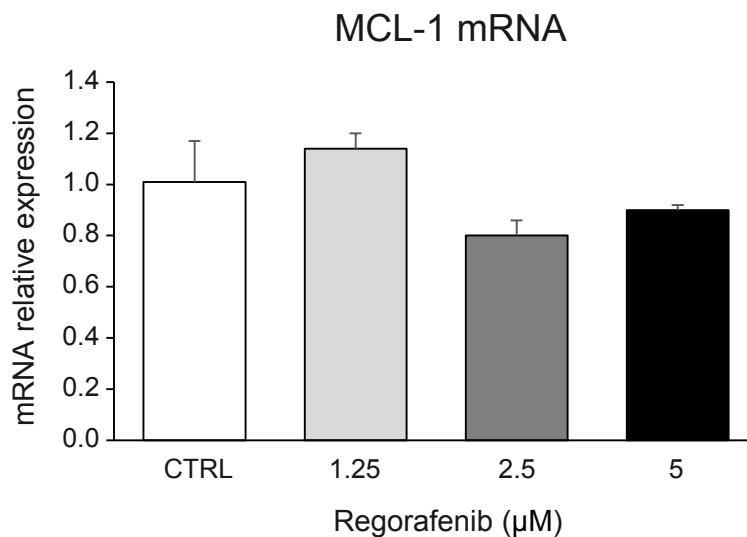

HepG2 cells were exposed to regorafenib (R, 1-5  $\mu\text{M}$ ) for 16 h and mRNA levels of MCL-1 were determined by qPCR. (n=2)

## Supplemental Figure 3

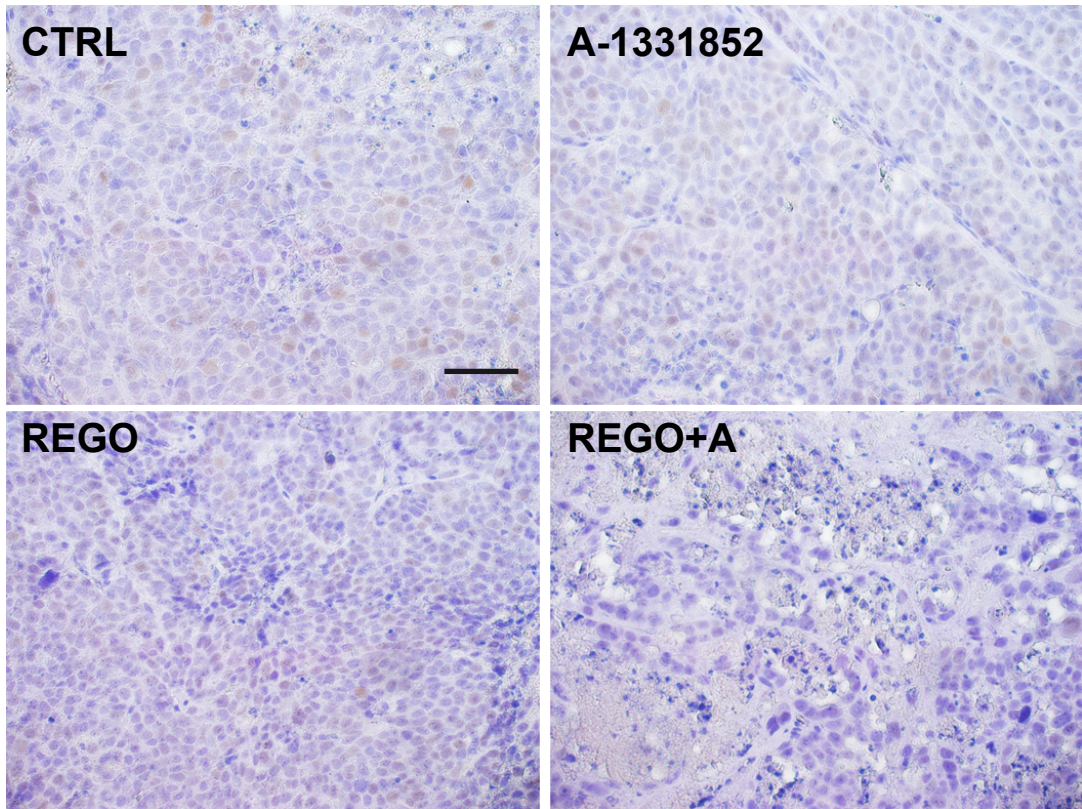

Representative images of Ki-67 expression in tumor samples from BCLC9 PDXs (scale bar, 50  $\mu$ m).

## Supplemental Figure 4

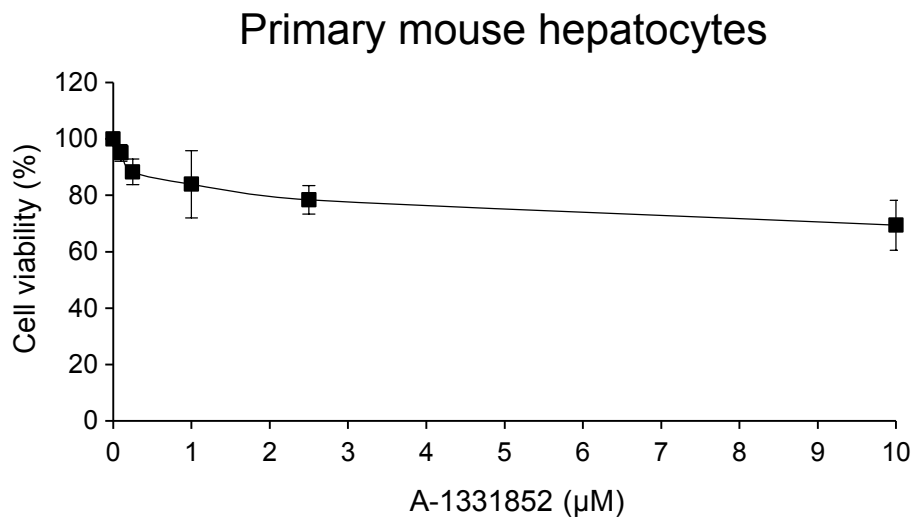

Primary mouse hepatocytes cultured on collagen plates were exposed to A-1331852 at different concentrations (up to 10  $\mu$ M) and MTT assays performed 16 h. (n=4)

## Supplemental Figure 5

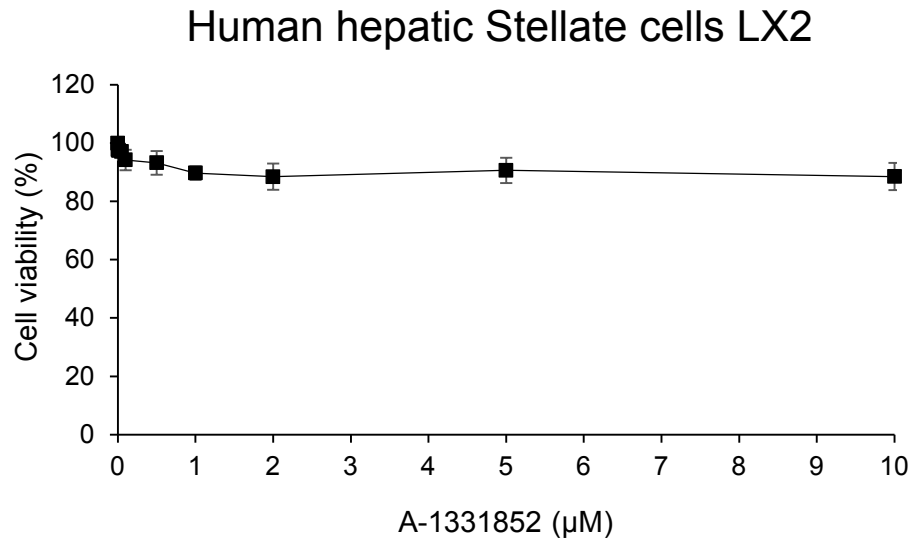

Human hepatic Stellate cells LX2 were exposed to A-1331852 at different concentrations (up to 10 µM) and MTT assays performed 16 h. (n=4)

## Supplemental Figure 6

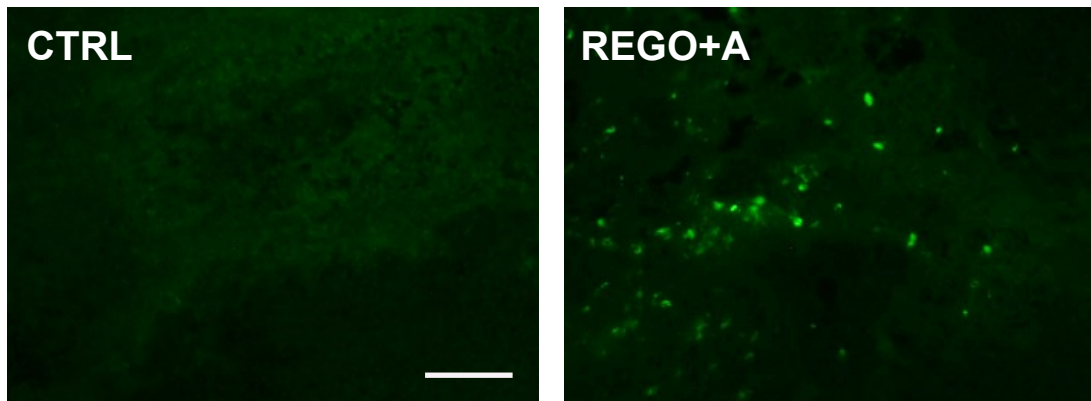

Representative images of TUNEL staining in tumor samples from R HEPG2 CDXs (scale bar, 100 µm).

The whole western blot

Figure 2F

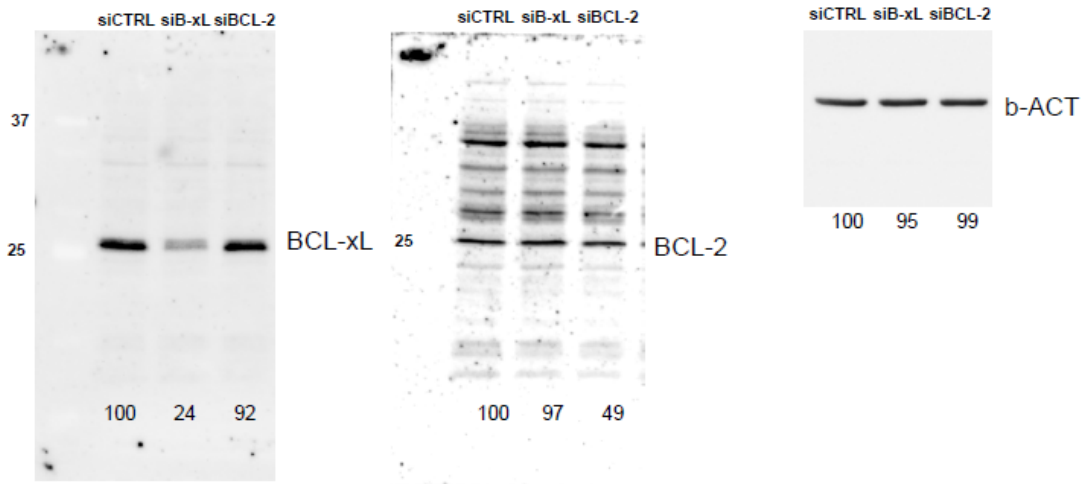

Figure 4B

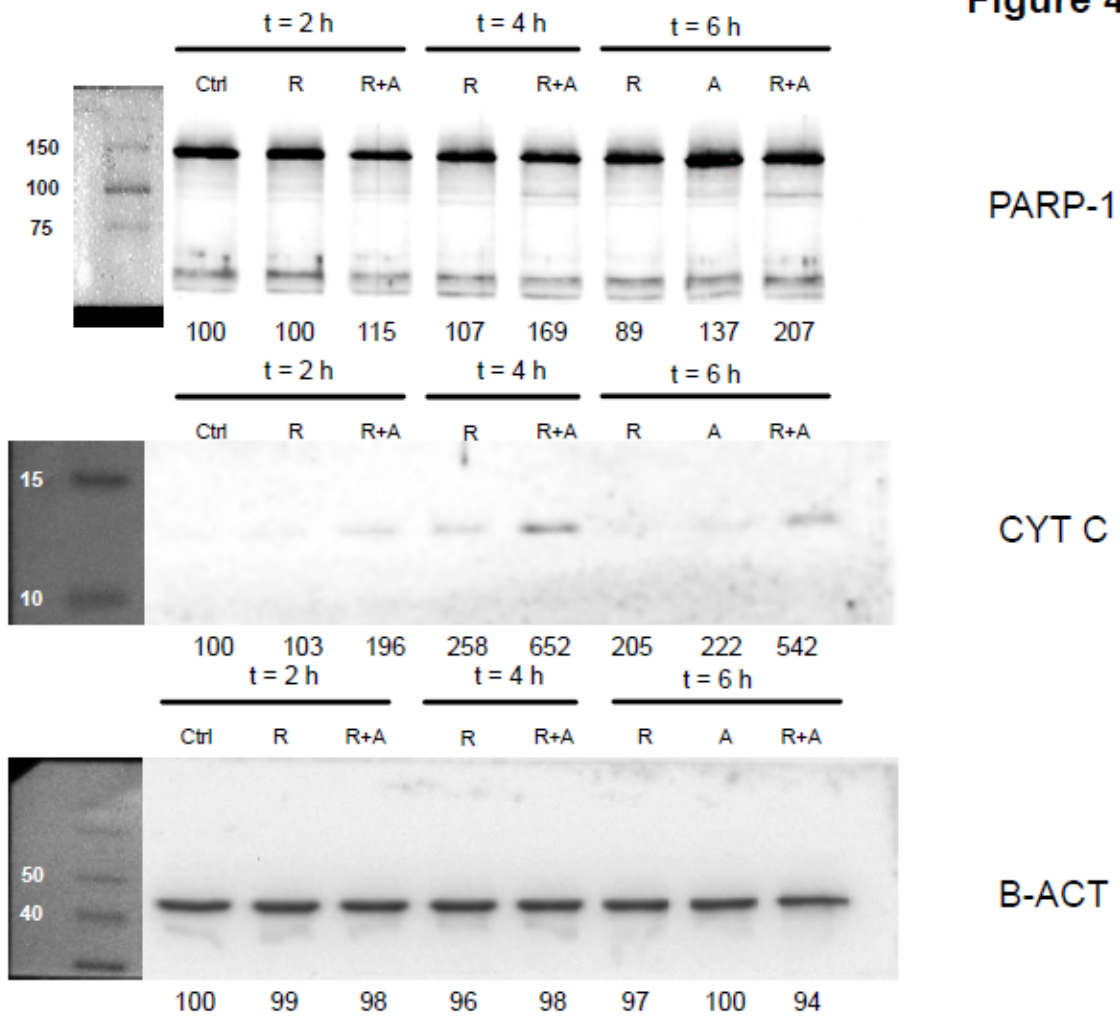

Figure 5A

HEP3B

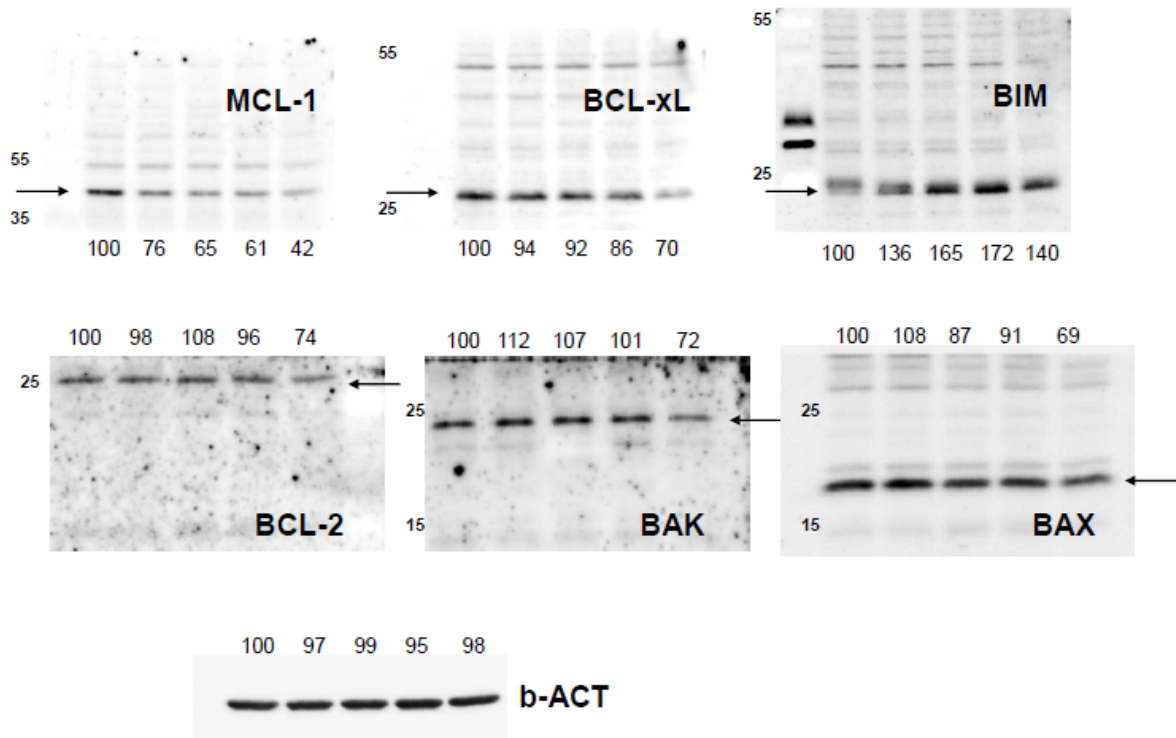

Figure 5A

HEPG2

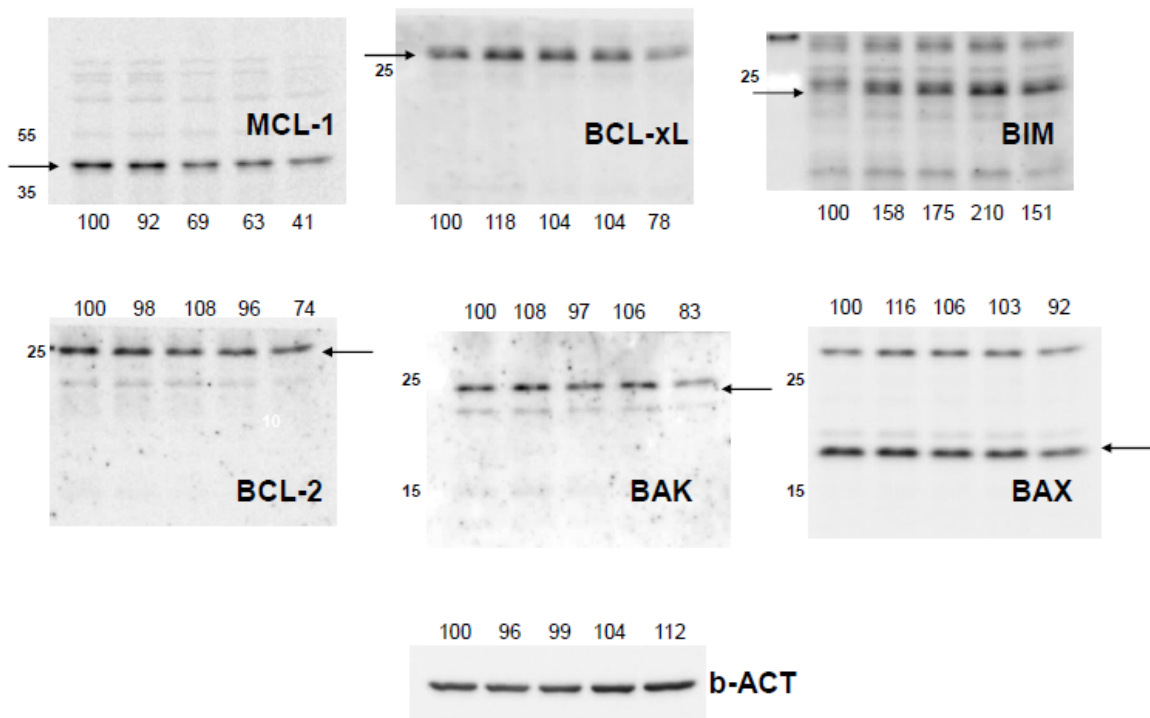

**Figure 7A**

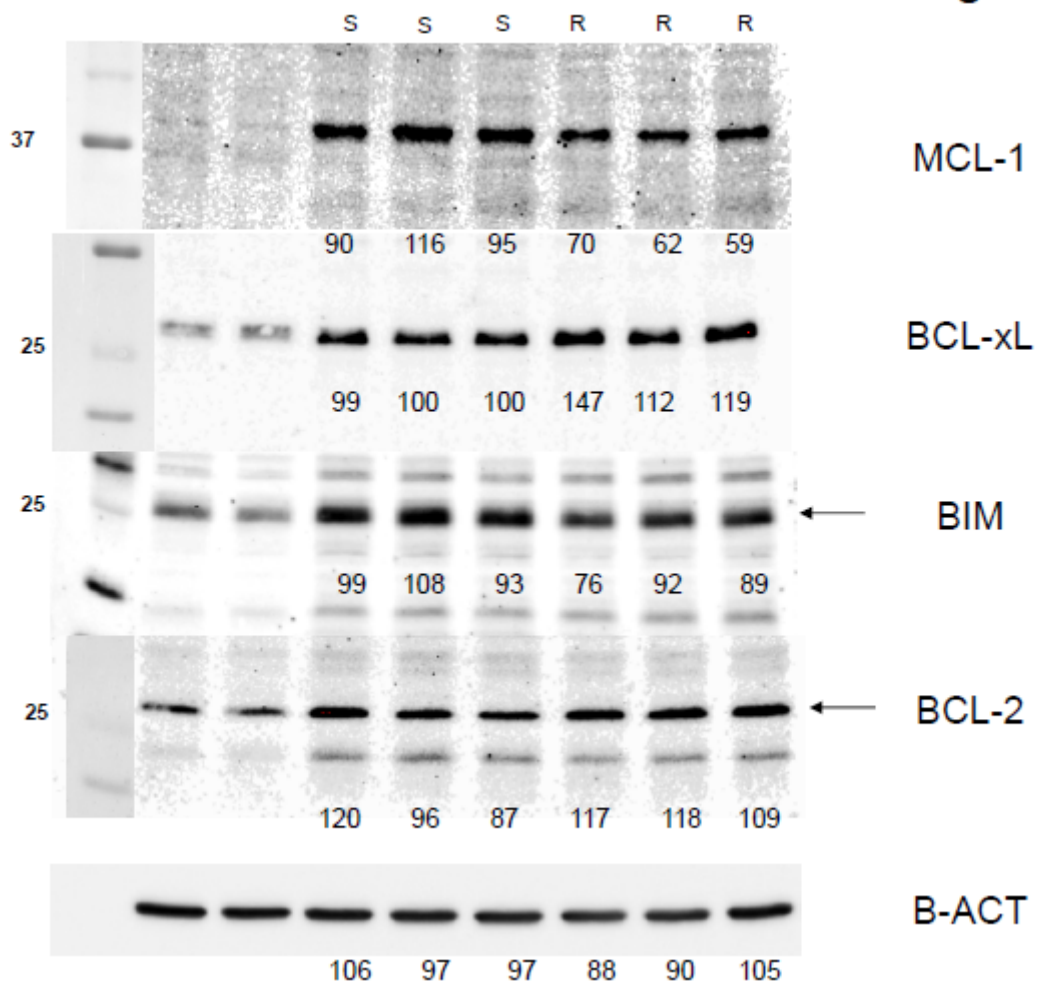

**Figure 4B**

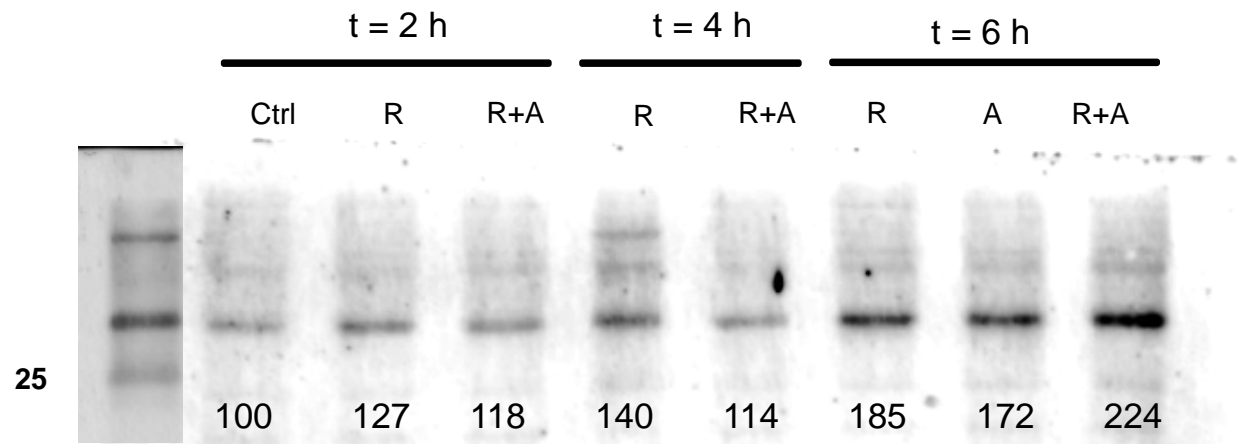

BAX MITO

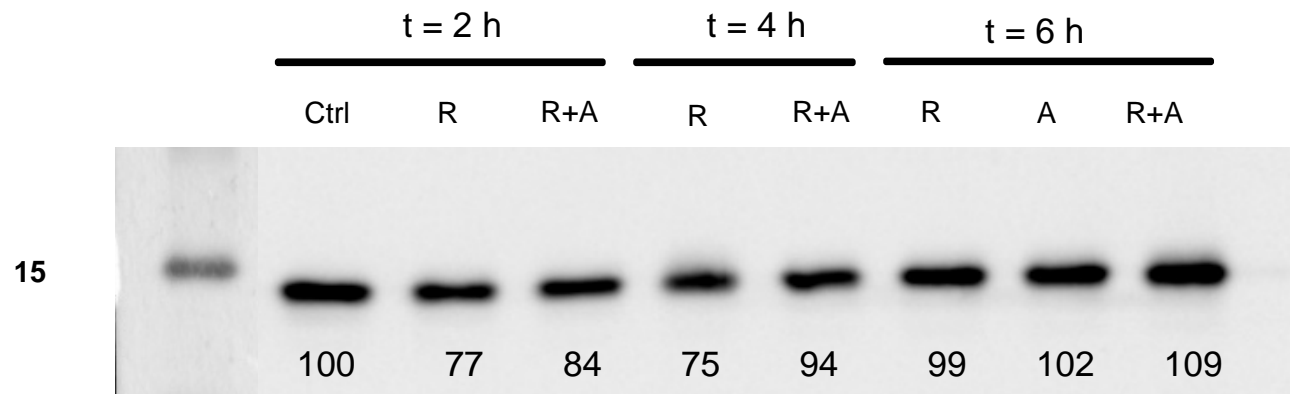

TOM20 MITO

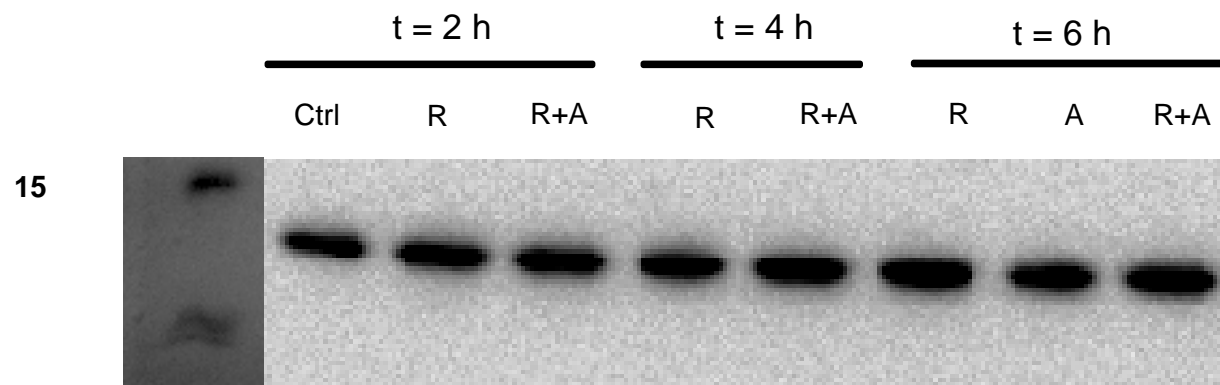

CYT C TOT



**Figure 4B**

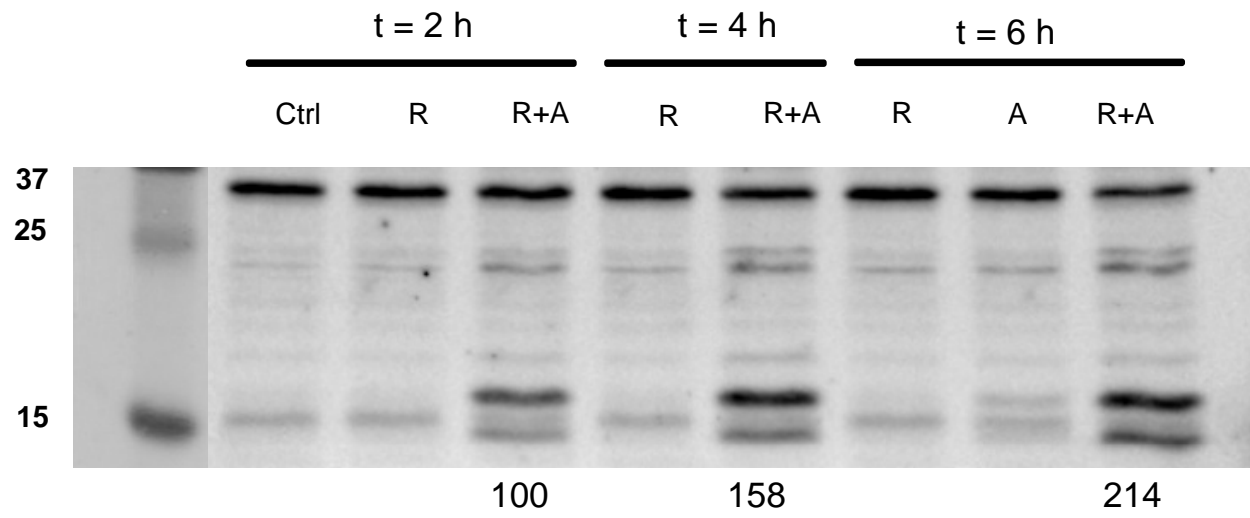

CASP-3 TOT

**Figure 4C**

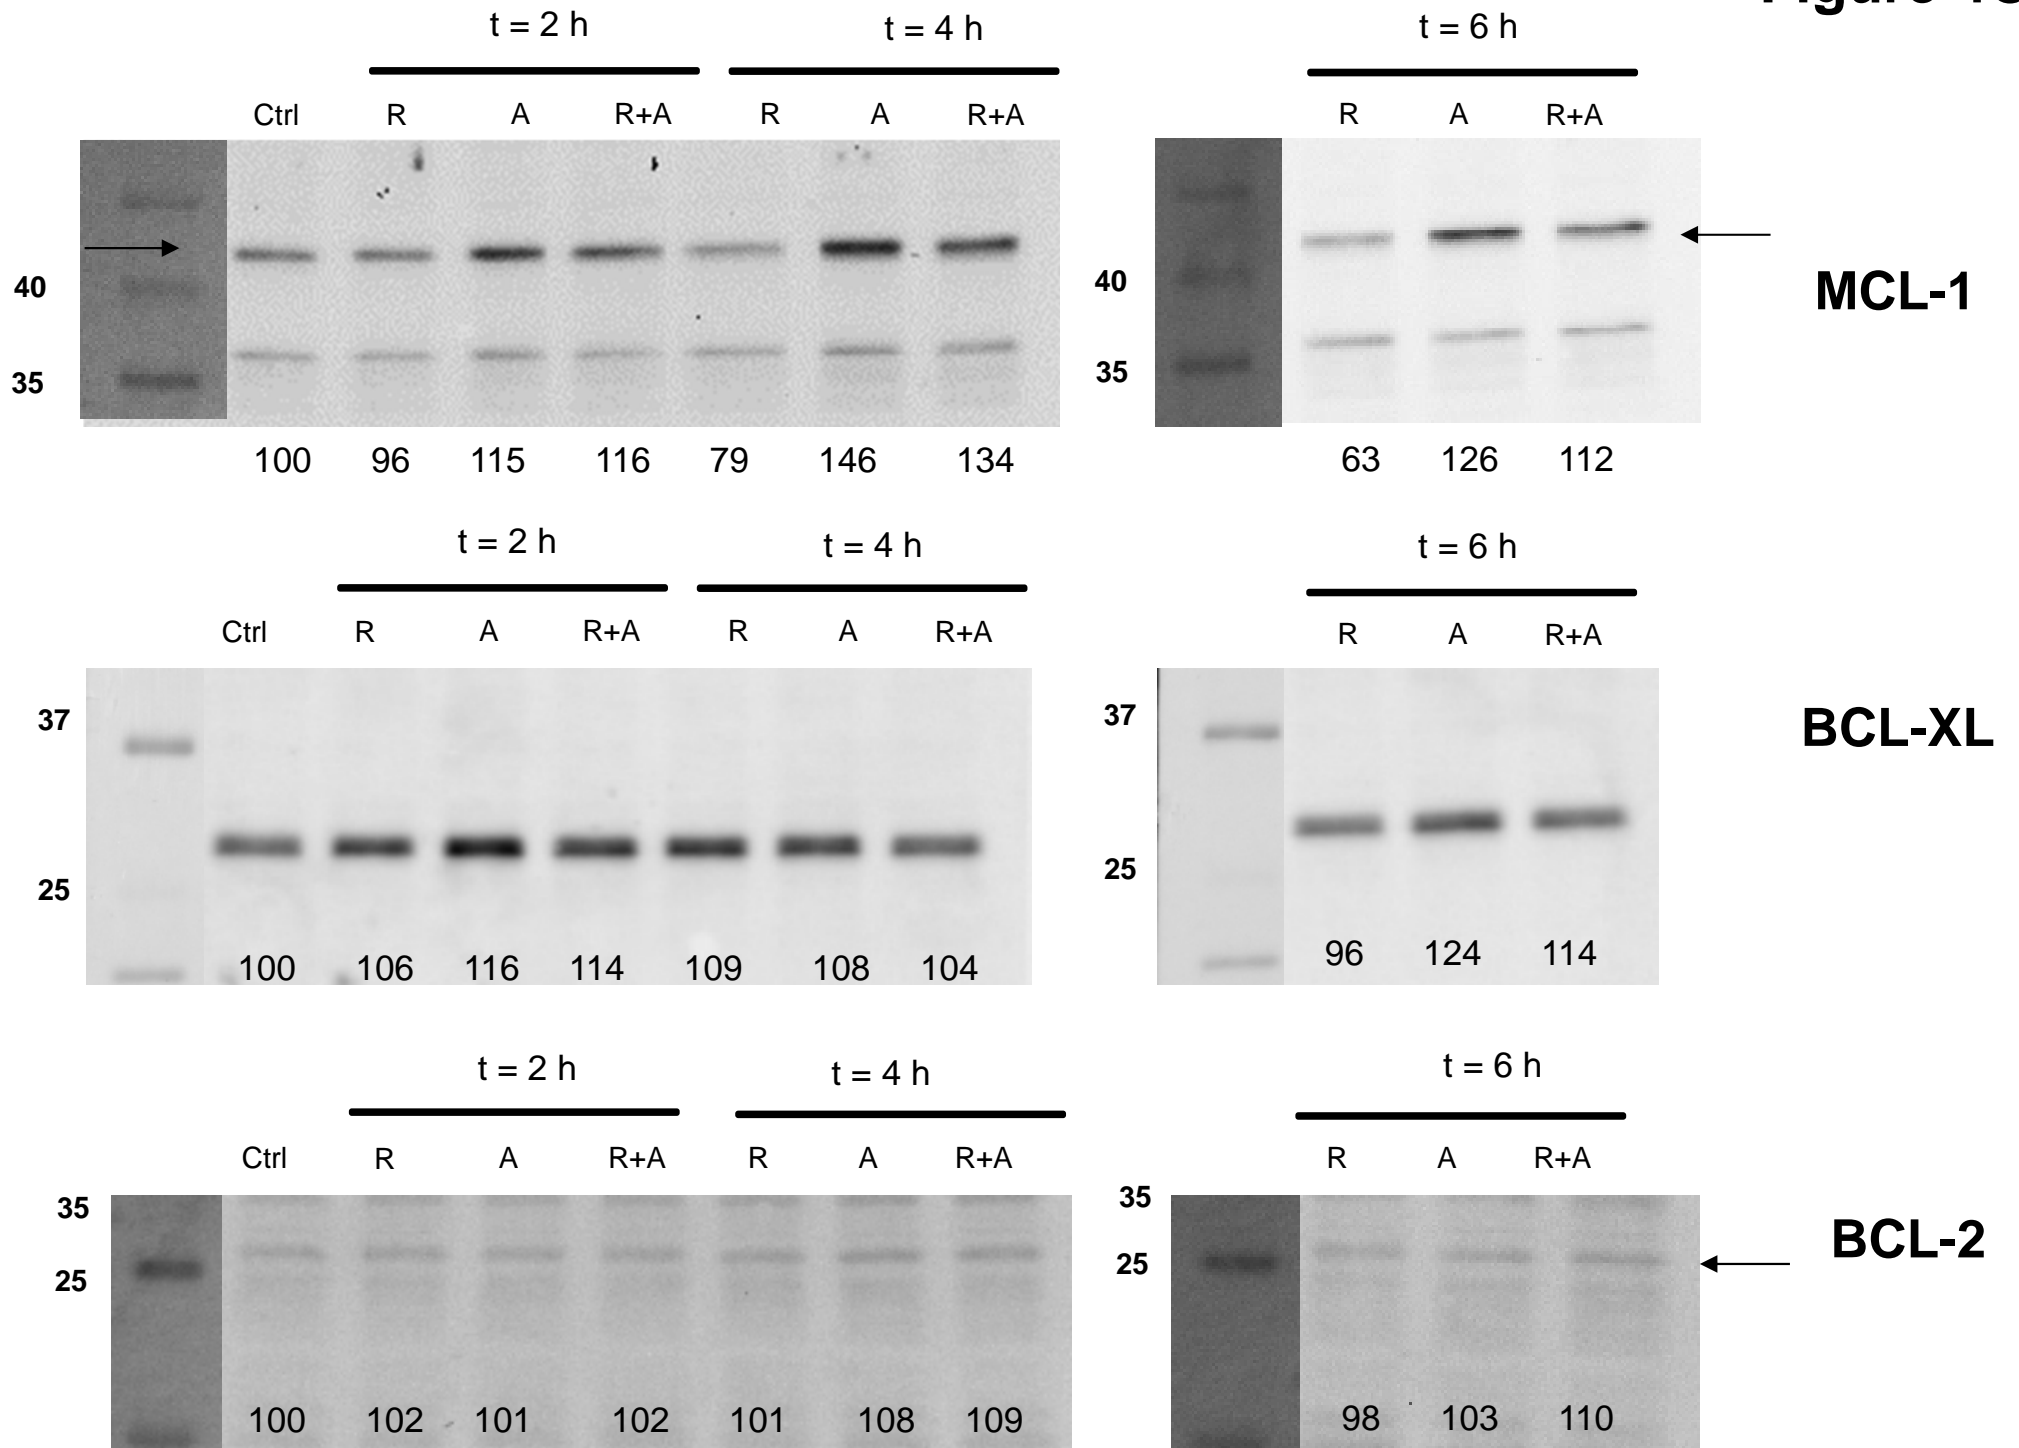

**Figure 4C**

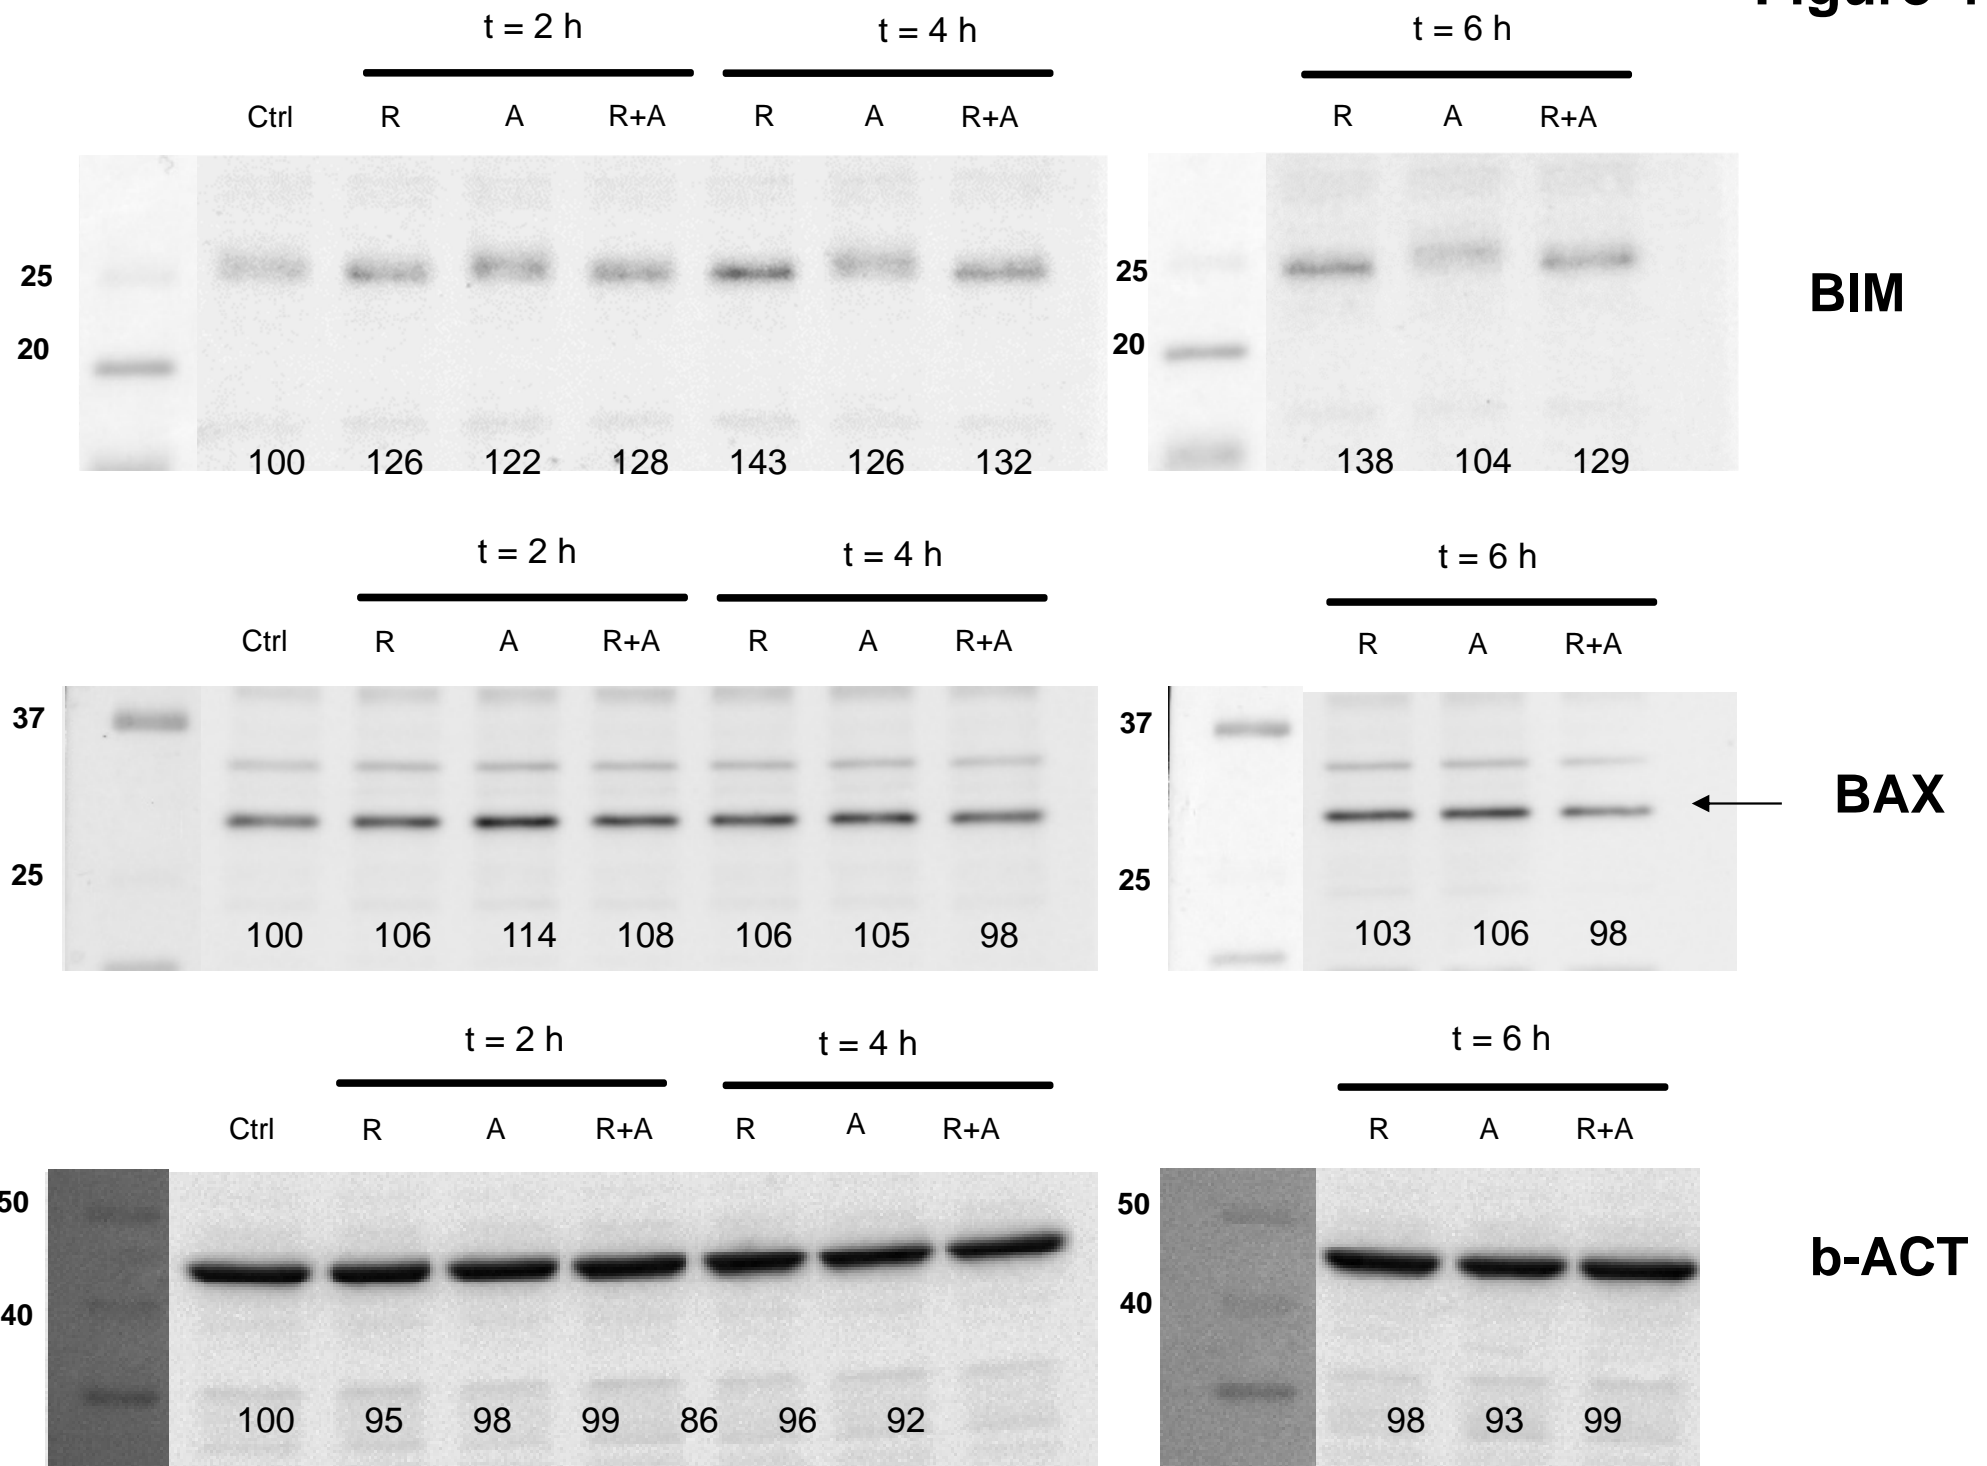

Supplement: cancers-12-00332-s001.pdf [file cancers-12-00332-s001.pdf]
